# Supplementary material for: Lumpy skin disease outbreaks in Egypt during 2017-2018 among sheeppox vaccinated cattle: Epidemiological, pathological, and molecular findings
Source: PubMed Central journal article supplement (PMC8528327; doi:10.1371/journal.pone.0258755), 2021-10-20
Supplement: pone.0258755.s001.pdf [file pone.0258755.s001.pdf]

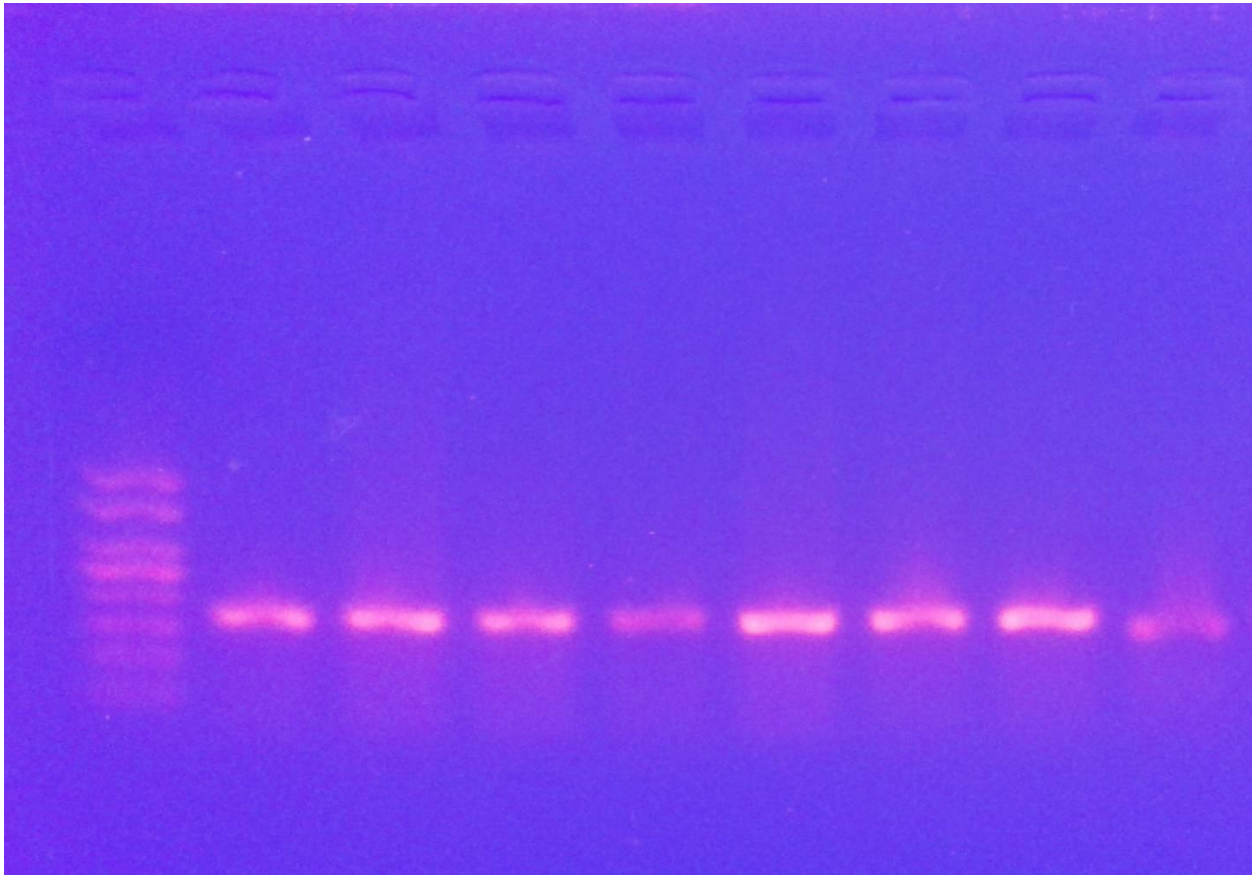

**Original image for fig.3**

Fig. 3. Gel electrophoresis of PCR products

Gel electrophoresis of PCR products using RPO30 specific primer set using 50bp ladder (with 172 bp expected product for LSDV (Lane 2 to lane 8) and 151 for SPPV (Lane: 9).
